# Supplementary material for: Reactions of iodine-nitrene reagents with boranes
Source: Royal Society of Chemistry journal article supplement (doi:10.1039/c5dt00142k), 2015-01-01

Supplementary Data for:

Reactions of Iodine-Nitrene Reagents with Boranes<sup>†</sup>

Shawn Postle and Douglas W. Stephan\*

**Synthesis of (C<sub>6</sub>F<sub>5</sub>)<sub>2</sub>BN(Ts)(C<sub>6</sub>F<sub>5</sub>) 1:** A 50 mL Schlenk flask was charged with TsN=IPh (88.6 mg, 0.237 mmol) in pentane (10 mL) to form a white slurry. A solution of B(C<sub>6</sub>F<sub>5</sub>)<sub>3</sub> (121.5 mg, 0.237 mmol) in pentane (10 mL) was added to the flask. After stirring overnight, a white insoluble powder was collected via filtration. The crude product was dissolved in a small volume of CH<sub>2</sub>Cl<sub>2</sub> (2 mL) and filtered through a plug of celite. The filtrate was collected and stored at – 35 °C to allow for the formation of small clear, colourless crystals. Yield 120 mg (74 %). <sup>1</sup>H NMR (400 MHz, C<sub>6</sub>D<sub>6</sub>, 25 °C): δ 7.35 (d, <sup>3</sup>J<sub>H-H</sub> = 8 Hz, 2H, CH tol), 6.49 (d, <sup>3</sup>J<sub>H-H</sub> = 8 Hz, 2H, CH tol), 1.75 (s, 3H, tol CH<sub>3</sub>). <sup>11</sup>B{<sup>1</sup>H} NMR (128 MHz, C<sub>6</sub>D<sub>6</sub>, 25 °C): δ 43.6 (br). <sup>19</sup>F (376 MHz, C<sub>6</sub>D<sub>6</sub>, 25 °C): δ – 128.60 (m, 2F, o-F (C<sub>6</sub>F<sub>5</sub>)), – 131.35 (m, 2F, o-F (C<sub>6</sub>F<sub>5</sub>)), – 142.19 (m, 2F, o-F N(C<sub>6</sub>F<sub>5</sub>)), – 146.68 (t, <sup>3</sup>J<sub>F-F</sub> = 21 Hz, 1F, p-F (C<sub>6</sub>F<sub>5</sub>)), – 148.69 (t, <sup>3</sup>J<sub>F-F</sub> = 22 Hz, 1F, p-F N(C<sub>6</sub>F<sub>5</sub>)), – 150.02 (t, <sup>3</sup>J<sub>F-F</sub> = 19 Hz, 1F, p-F (C<sub>6</sub>F<sub>5</sub>)), – 159.04 (m, 2F, m-F (C<sub>6</sub>F<sub>5</sub>)), – 160.27 (m, 2F, m-F N(C<sub>6</sub>F<sub>5</sub>)), – 161.06 (m, 2F, m-F (C<sub>6</sub>F<sub>5</sub>)). HRMS (EI-TOF) m/z: [M]<sup>+</sup> Calcd for C<sub>25</sub>H<sub>7</sub>BF<sub>15</sub>NO<sub>2</sub>S 681.0085, Found 681.0068.

**Synthesis of (C<sub>6</sub>F<sub>5</sub>)<sub>2</sub>BN(Ts)(C<sub>6</sub>F<sub>5</sub>) · OPET<sub>3</sub> 2:** A 4 dram scintillation vial was charged with **1** (53.3 mg, 0.0782 mmol) in toluene (1 mL). To the solution, OPET<sub>3</sub> (10.5 mg, 0.0783 mmol) was added. The solution was left at room temperature overnight to afford large rectangular crystals, suitable for x-ray diffraction. Yield 56.1 mg (88 %). <sup>1</sup>H NMR (400 MHz, tol-d<sub>8</sub>, 25 °C): δ 7.64 (d, <sup>3</sup>J<sub>H-H</sub> = 8 Hz, 2H, tol CH), 6.66 (d, <sup>3</sup>J<sub>H-H</sub> = 8 Hz, 2H, tol CH), 1.88 (m, 6H, CH<sub>2</sub> Et CH<sub>2</sub>), 1.84 (s, 3H, tol CH<sub>3</sub>), 0.68 (dt, <sup>3</sup>J<sub>p-H</sub> = 18 Hz, <sup>3</sup>J<sub>H-H</sub> = 8 Hz, 9H, Et CH<sub>3</sub>). <sup>11</sup>B{<sup>1</sup>H} NMR (128 MHz, tol-d<sub>8</sub>, 25 °C): δ 1.41 (s). <sup>19</sup>F (376 MHz, tol-d<sub>8</sub>, 25 °C): δ – 133.44 (br, 4F, o-F B(C<sub>6</sub>F<sub>5</sub>)), – 137.99 (s, 2F, o-F N(C<sub>6</sub>F<sub>5</sub>)), – 154.59 (s, 1F, p-F N(C<sub>6</sub>F<sub>5</sub>)), – 156.70 (br, 2F, p-F B(C<sub>6</sub>F<sub>5</sub>)), – 163.86 (br, 4F, m-F B(C<sub>6</sub>F<sub>5</sub>)), – 164.10 (s, 2F, m-F N(C<sub>6</sub>F<sub>5</sub>)). <sup>31</sup>P{<sup>1</sup>H} NMR (162MHz, tol-d<sub>8</sub>, 25 °C): δ 78.50 (s).

**Synthesis of (C<sub>6</sub>F<sub>5</sub>)<sub>2</sub>BN(Ph)Ts 3:** A 50 mL Schlenk flask was charged with TsN=IPh (17.4 mg, 0.0466 mmol) in pentane (10 mL). To the flask, a solution of PhB(C<sub>6</sub>F<sub>5</sub>)<sub>2</sub> (19.7 mg, 0.0467 mmol) in pentane (10 mL) was added. The reaction mixture was allowed to stir overnight. A white solid was collected via filtration. The solid was redissolved in CH<sub>2</sub>Cl<sub>2</sub> and cooled to – 35 °C to afford clear colourless crystals. Yield 20.9 mg (76 %). <sup>1</sup>H NMR (400 MHz, tol-d<sub>8</sub>, 25 °C): δ 7.36 (d, <sup>3</sup>J<sub>H-H</sub> = 8 Hz, 2H, CH tol), 6.94 (d, <sup>3</sup>J<sub>H-H</sub> = 7 Hz, 2H, CH Ph), 6.63 (m, 3H, CH Ph), 6.54 (d, <sup>3</sup>J<sub>H-H</sub> = 8 Hz, 2H, CH tol), 1.81 (s, 3H, CH<sub>3</sub> tol). <sup>11</sup>B{<sup>1</sup>H} NMR (128 MHz, tol-d<sub>8</sub>, 25 °C): δ 42.00. <sup>19</sup>F (376 MHz, tol-d<sub>8</sub>, 25 °C): δ –131.42 (br, 4F, o-F (C<sub>6</sub>F<sub>5</sub>)), –131.62 (br, 4F, o-F (C<sub>6</sub>F<sub>5</sub>)), –150.95 (t, <sup>3</sup>J<sub>F-F</sub> = 18 Hz, 2F, p-F (C<sub>6</sub>F<sub>5</sub>)), –151.59 (t, <sup>3</sup>J<sub>F-F</sub> = 18 Hz, 2F, p-F (C<sub>6</sub>F<sub>5</sub>)), –161.06 (br, 4F, m-F (C<sub>6</sub>F<sub>5</sub>)), –131.42 (br, 4F, m-F (C<sub>6</sub>F<sub>5</sub>)). HRMS (EI-TOF) m/z: [M]<sup>+</sup> Calcd for C<sub>25</sub>H<sub>12</sub>BF<sub>10</sub>NO<sub>2</sub>S 591.0522, Found 591.0529.

Aminoboranes of the general formula  $(C_6F_5)_2BNH(R)$ , where R = Ts, Ms, Cls, Ns, can be generated by reacting equimolar amounts of the appropriate ylide with either  $(C_6F_5)_2BCl$  or  $(C_6F_5)_2BH$ . A sample preparation is provided below.

**Synthesis of  $(C_6F_5)_2BNH(Ts)$  2a:** A 50 mL schlenk was charged with TsN=IPh (16.6 mg, 0.044 mmol) in pentane (10 mL) to form a white slurry. A solution of  $(C_6F_5)_2BCl$  (16.9 mg, 0.044 mmol) was added to the schlenk flask. The resulting slurry was stirred overnight and the white insoluble solid was subsequently collected by filtration. The powder was then dissolved in  $CH_2Cl_2$  and stored at  $-35\text{ }^\circ\text{C}$  to allow for the formation of clear, colourless crystals. Crystals suitable for X-ray diffraction were obtained from a  $CH_2Cl_2$  solution for compounds 2a, b, d.  $(C_6F_5)_2BNH(Ts)$

**4:**  $^1H$  NMR (400 MHz,  $C_6D_6$ ,  $25\text{ }^\circ\text{C}$ ):  $\delta$  7.88 (s, 1H, NH), 7.74 (d,  $^3J_{H-H} = 8\text{ Hz}$ , 2H, tol CH), 6.67 (d,  $^3J_{H-H} = 8\text{ Hz}$ , 2H, tol CH), 1.84 (s, 3H,  $CH_3$ ).  $^{11}B\{^1H\}$  NMR (128 MHz,  $C_6D_6$ ,  $25\text{ }^\circ\text{C}$ ):  $\delta$  34.4 (s).  $^{19}F$  (376 MHz,  $C_6D_6$ ,  $25\text{ }^\circ\text{C}$ ):  $\delta$  -136.07 (br, 2F, *o*-F ( $C_6F_5$ )), -136.43 (br, 2F, *o*-F ( $C_6F_5$ )), -151.24 (br, 1F, *p*-F ( $C_6F_5$ )), -156.19 (br, 1F, *p*-F ( $C_6F_5$ )), -165.07 (br, 2F, *m*-F ( $C_6F_5$ )), -165.35 (br, 2F, *m*-F ( $C_6F_5$ )). HRMS (EI-TOF) m/z:  $[M]^+$  Calcd for  $C_{19}H_8BF_{10}NO_2S$  515.0209, Found 515.0225.  $(C_6F_5)_2BNH(Cls)$

**5:**  $^1H$  NMR (400 MHz,  $C_6D_6$ ,  $25\text{ }^\circ\text{C}$ ):  $\delta$  7.46 (s, 1H, NH), 7.20 (d,  $^3J_{H-H} = 9\text{ Hz}$ , 2H, CH Ph), 6.73 (d,  $^3J_{H-H} = 8\text{ Hz}$ , 2H, CH Ph).  $^{11}B\{^1H\}$  NMR (128 MHz,  $C_6D_6$ ,  $25\text{ }^\circ\text{C}$ ):  $\delta$  39.30 (br).  $^{19}F$  (376 MHz,  $C_6D_6$ ,  $25\text{ }^\circ\text{C}$ ):  $\delta$  -131.32 (s, 4F, *o*-F ( $C_6F_5$ )), -145.84 (br, 2F, *p*-F ( $C_6F_5$ )), -149.90 (br, 2F, *p*-F ( $C_6F_5$ )), -160.73 (br, 4F, *m*-F ( $C_6F_5$ )). HRMS (EI-TOF) m/z:  $[M]^+$  Calcd for  $C_{18}H_5BF_{10}NO_2S$  534.9663, Found 534.9659.  $(C_6F_5)_2BNH(Ms)$

**6:**  $^1H$  NMR (400 MHz, *tol-d*<sub>8</sub>,  $25\text{ }^\circ\text{C}$ ):  $\delta$  7.32 (s, 1H, NH), 2.26 (s, 3H,  $CH_3$ ).  $^{11}B\{^1H\}$  NMR (128 MHz, *tol-d*<sub>8</sub>,  $25\text{ }^\circ\text{C}$ ):  $\delta$  39.74 (br).  $^{19}F$  (376 MHz, *tol-d*<sub>8</sub>,  $25\text{ }^\circ\text{C}$ ):  $\delta$  -131.54 (br, 2F, *o*-F ( $C_6F_5$ )), -132.19 (br, 2F, *o*-F ( $C_6F_5$ )), -146.09 (br, 1F, *p*-F ( $C_6F_5$ )), -150.01 (br, 1F, *p*-F ( $C_6F_5$ )), -160.30 (br, 2F, *m*-F ( $C_6F_5$ )), -161.38 (br, 2F, *m*-F ( $C_6F_5$ )). HRMS (EI-TOF) m/z:  $[M]^+$  Calcd for  $C_{13}H_4BF_{10}NO_2S$  438.9896, Found 438.9897.  $(C_6F_5)_2BNH(Ns)$

**7:**  $^1H$  NMR (400 MHz,  $C_6D_6$ ,  $25\text{ }^\circ\text{C}$ ):  $\delta$  7.35 (d,  $^3J_{H-H} = 9\text{ Hz}$ , 2H, CH Ph), 7.23 (s, 1H, NH), 7.09 (d,  $^3J_{H-H} = 8\text{ Hz}$ , 2H, CH Ph).  $^{11}B\{^1H\}$  NMR (128 MHz,  $C_6D_6$ ,  $25\text{ }^\circ\text{C}$ ):  $\delta$  39.55 (br).  $^{19}F$  (376 MHz,  $C_6D_6$ ,  $25\text{ }^\circ\text{C}$ ):  $\delta$  -131.36 (s, 4F, *o*-F ( $C_6F_5$ )), -144.69 (br, *p*-F ( $C_6F_5$ )), -149.25 (br, *p*-F ( $C_6F_5$ )), -160.31 (br, 4F, *m*-F ( $C_6F_5$ )). HRMS (EI-TOF) m/z:  $[M]^+$  Calcd for  $C_{18}H_5BF_{10}N_2O_4S$  545.9903, Found 545.9904.

| Compound                    | $^{31}P$ (ppm) | $\Delta\delta$ (ppm) |
|-----------------------------|----------------|----------------------|
| $(C_6F_5)_2BN(H)(Ms)$       | 79.79          | 28.32                |
| $(C_6F_5)_2BN(H)(Ts)$       | 80.16          | 28.69                |
| $(C_6F_5)_2BN(H)(C_6H_4Cl)$ | 80.52          | 29.05                |
| $(C_6F_5)_2BN(H)(Ns)$       | 80.66          | 29.19                |

$(C_6F_5)_2BN(Ts)(C_6F_5)$  **1**  $^1H$

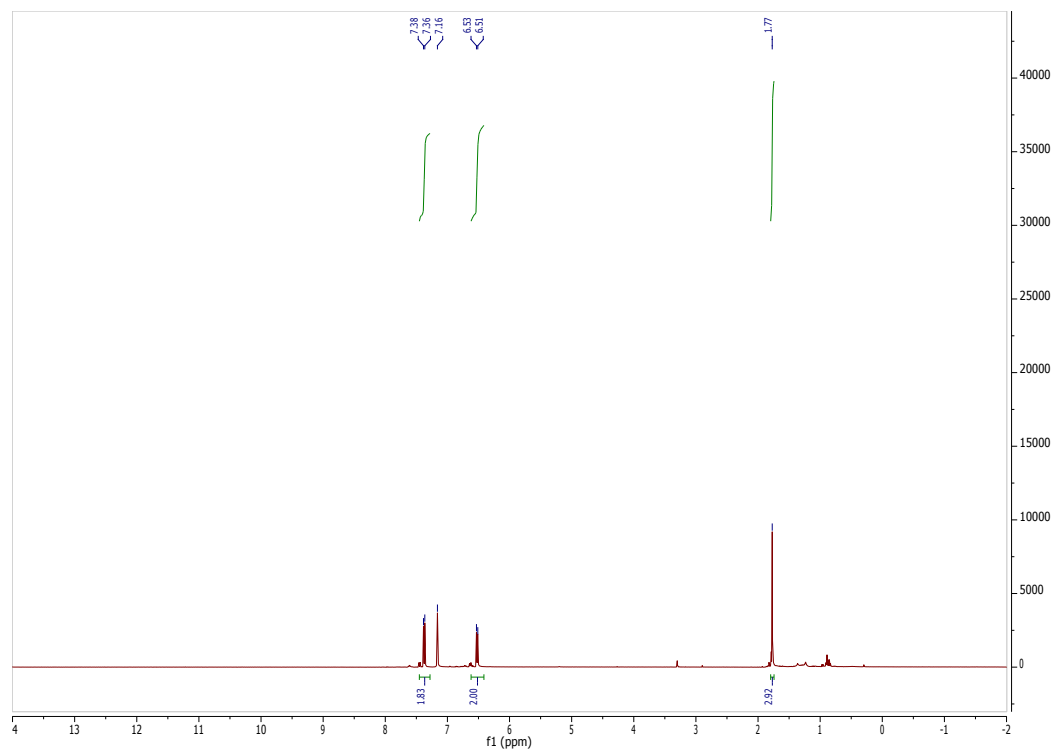

$^{11}B$

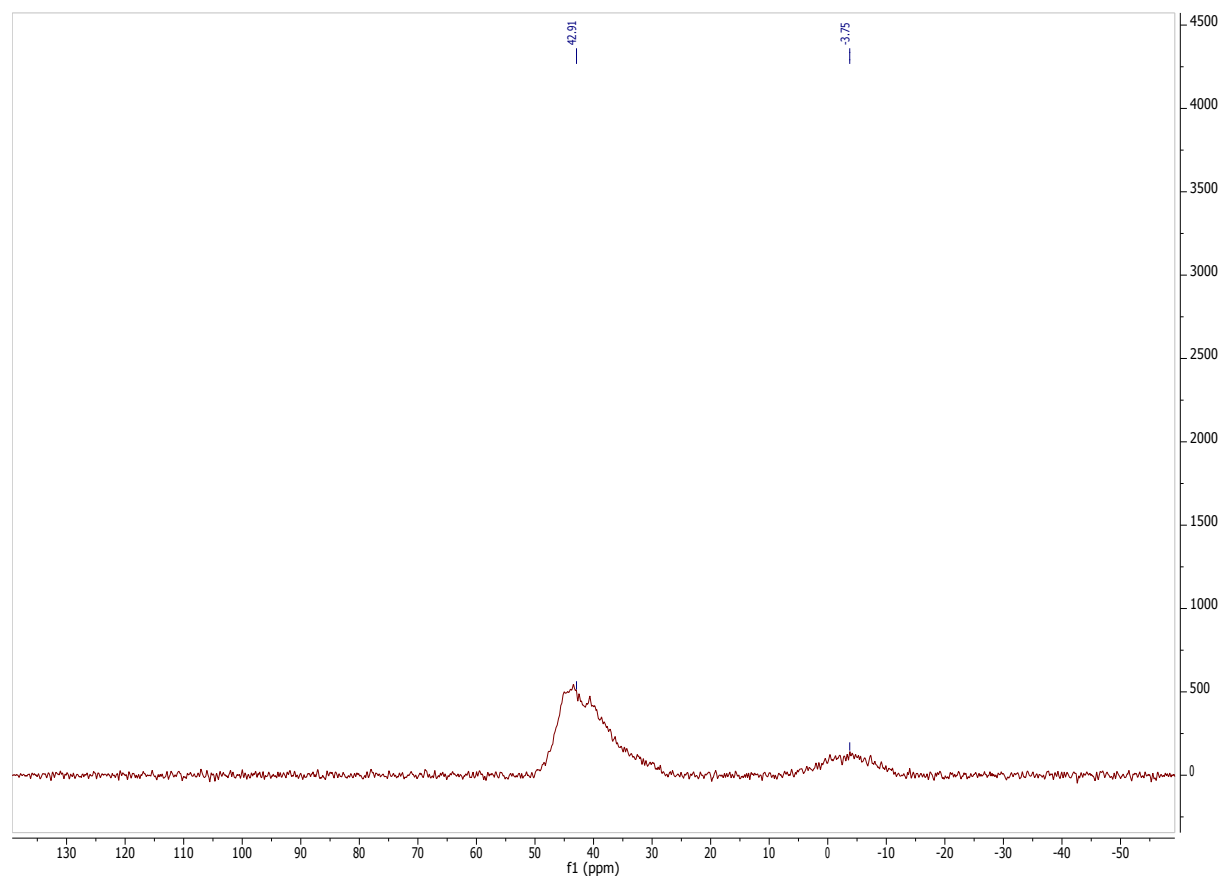

$^{19}\text{F}$

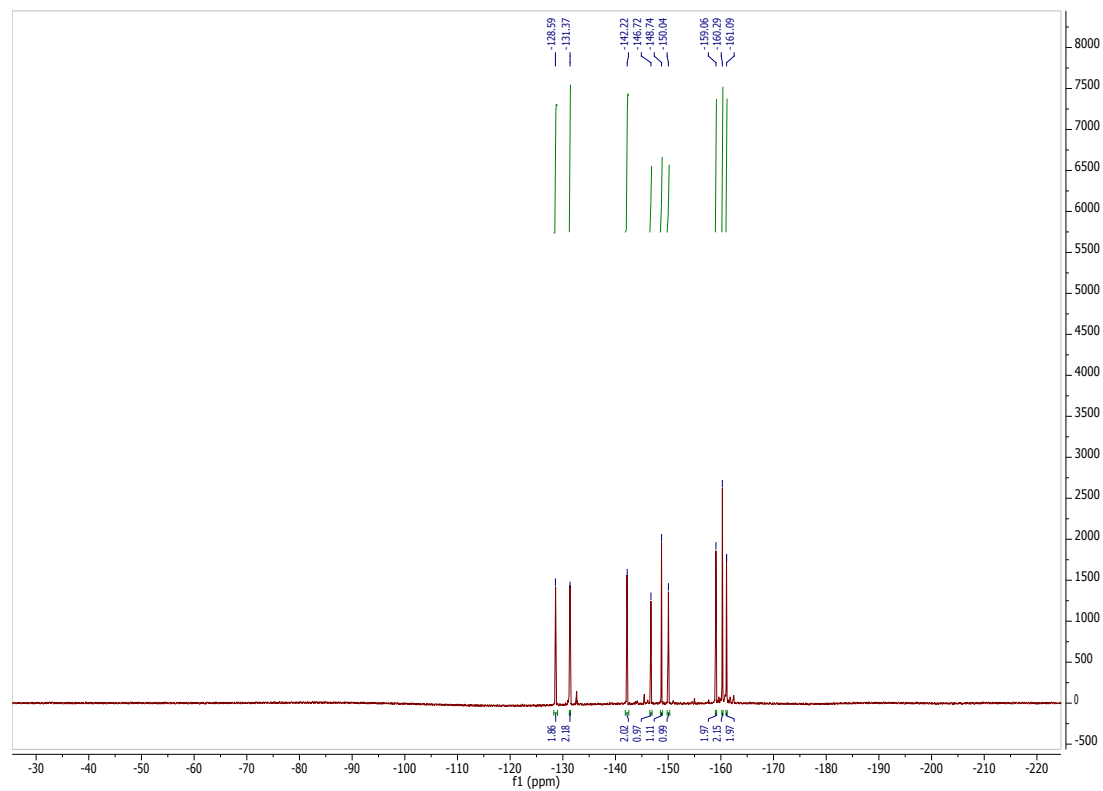

$(\text{C}_6\text{F}_5)_2\text{BN}(\text{Ts})(\text{C}_6\text{F}_5) \cdot \text{OPET}_3 \mathbf{2} \text{ } ^1\text{H}$

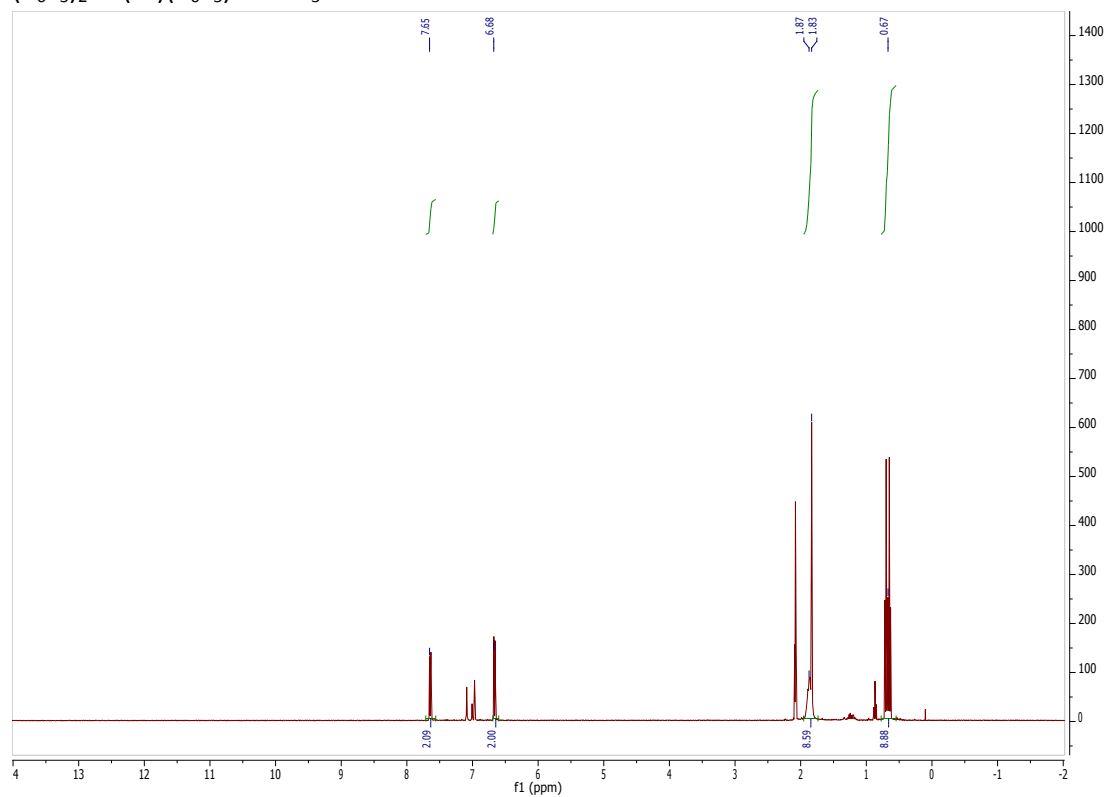

<sup>11</sup>B

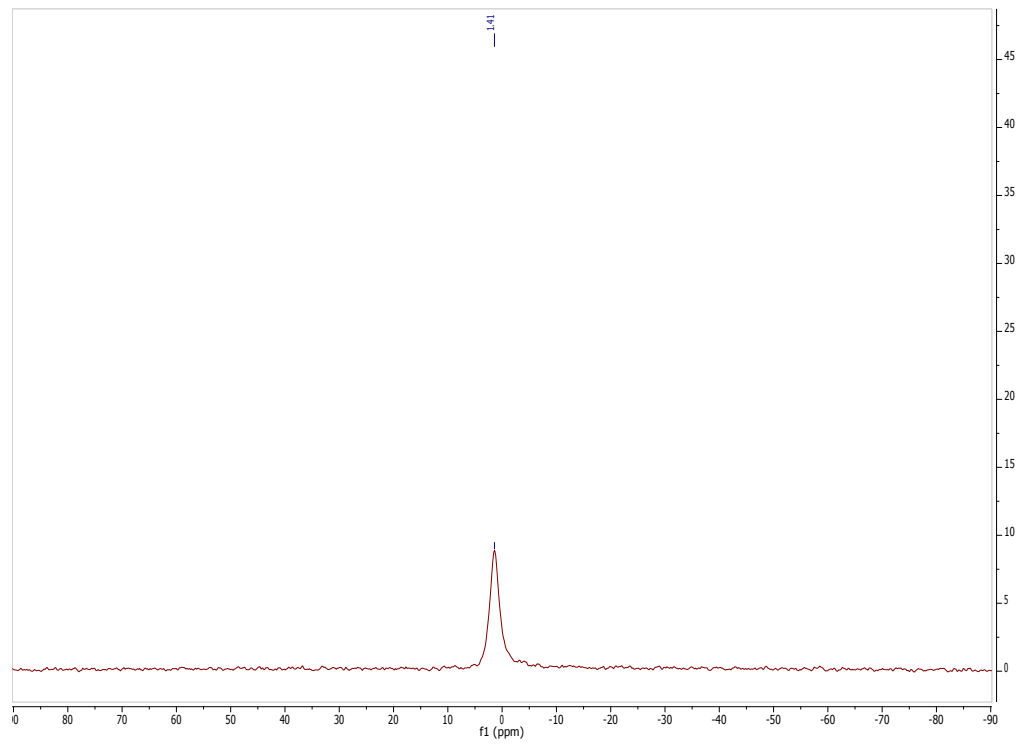

<sup>19</sup>F

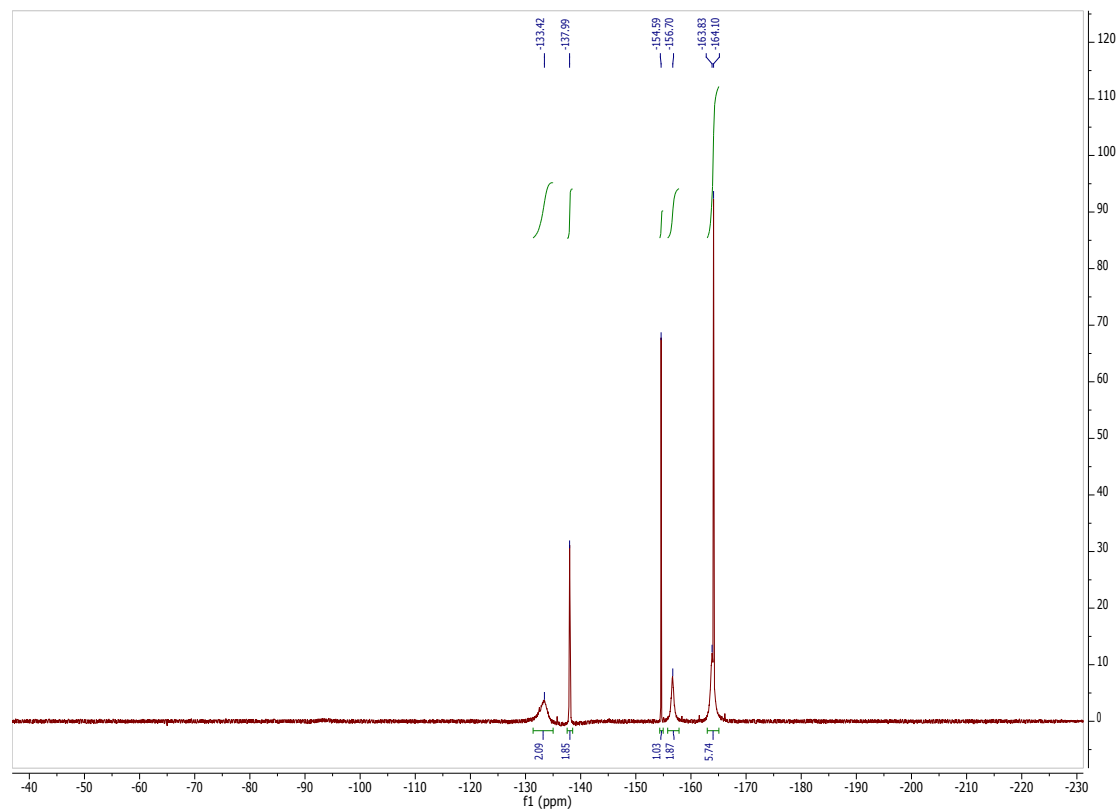

$^{31}\text{P}$

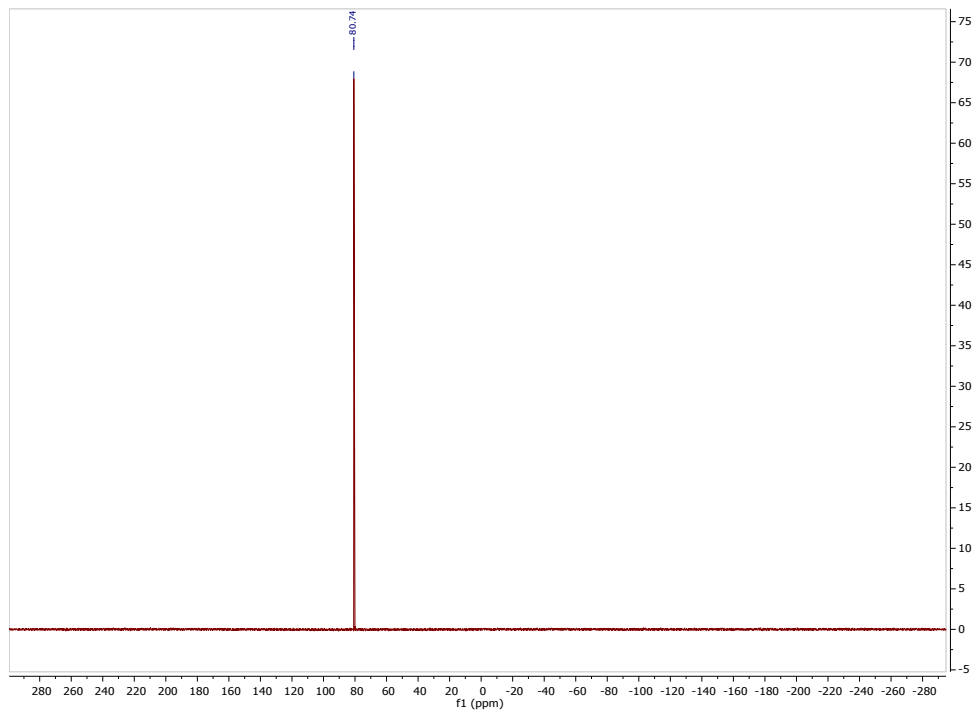

$(\text{C}_6\text{F}_5)_2\text{BN}(\text{Ph})\text{Ts}$  **3**  $^1\text{H}$

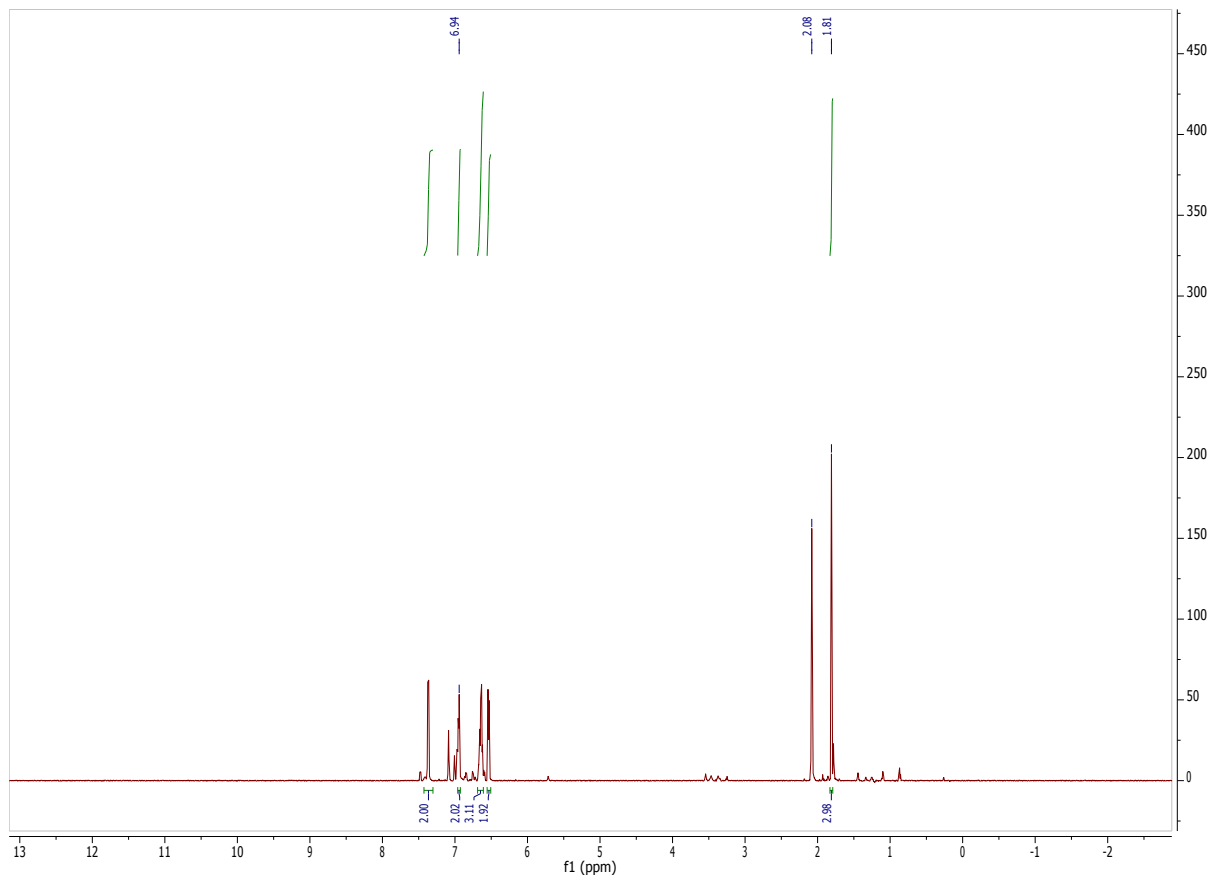

<sup>11</sup>B

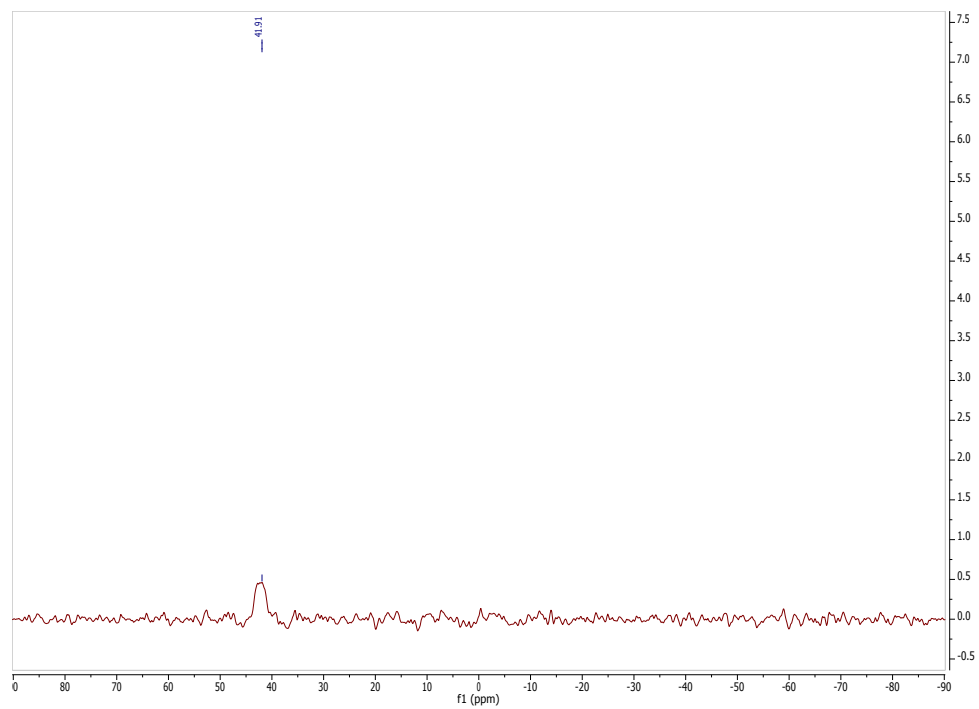

<sup>19</sup>F

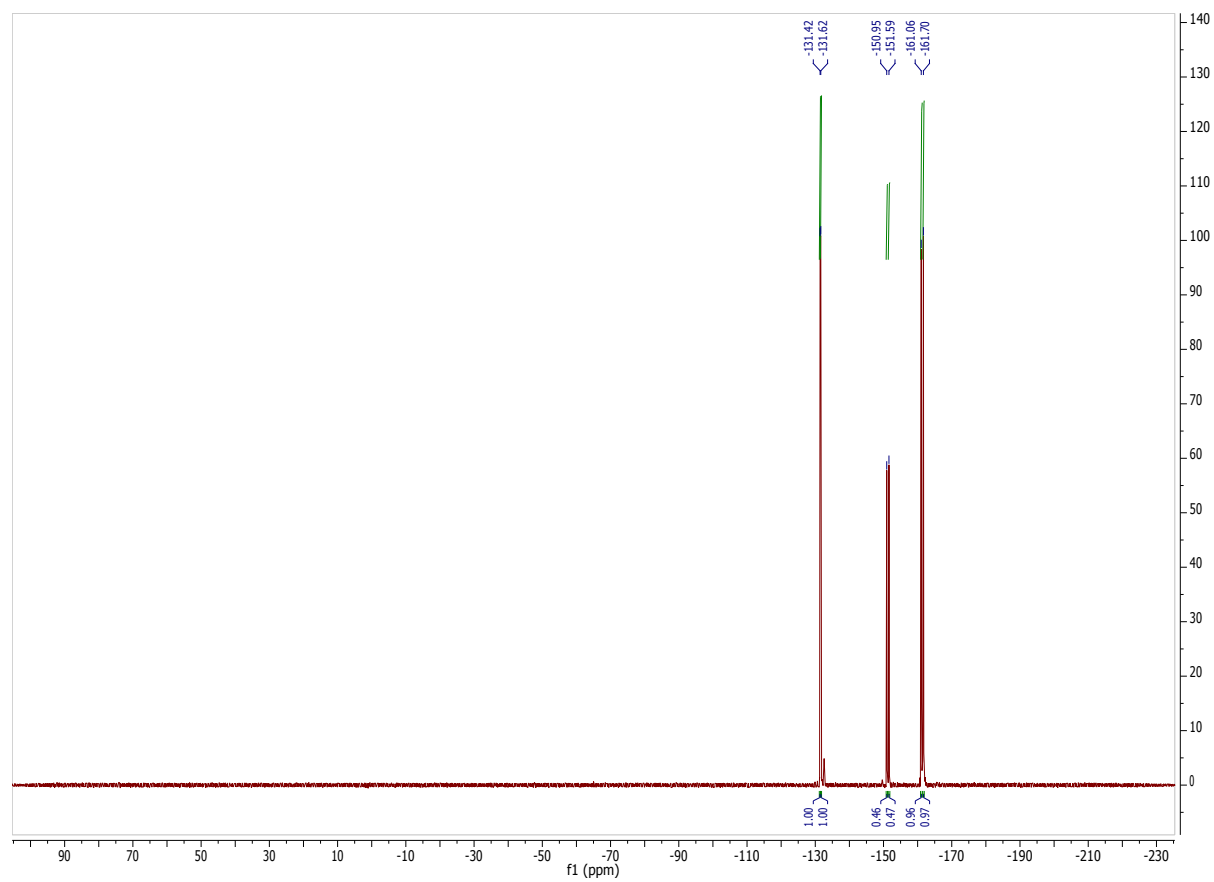

$(C_6F_5)_2BNH(Ts)$  **4**  $^1H$

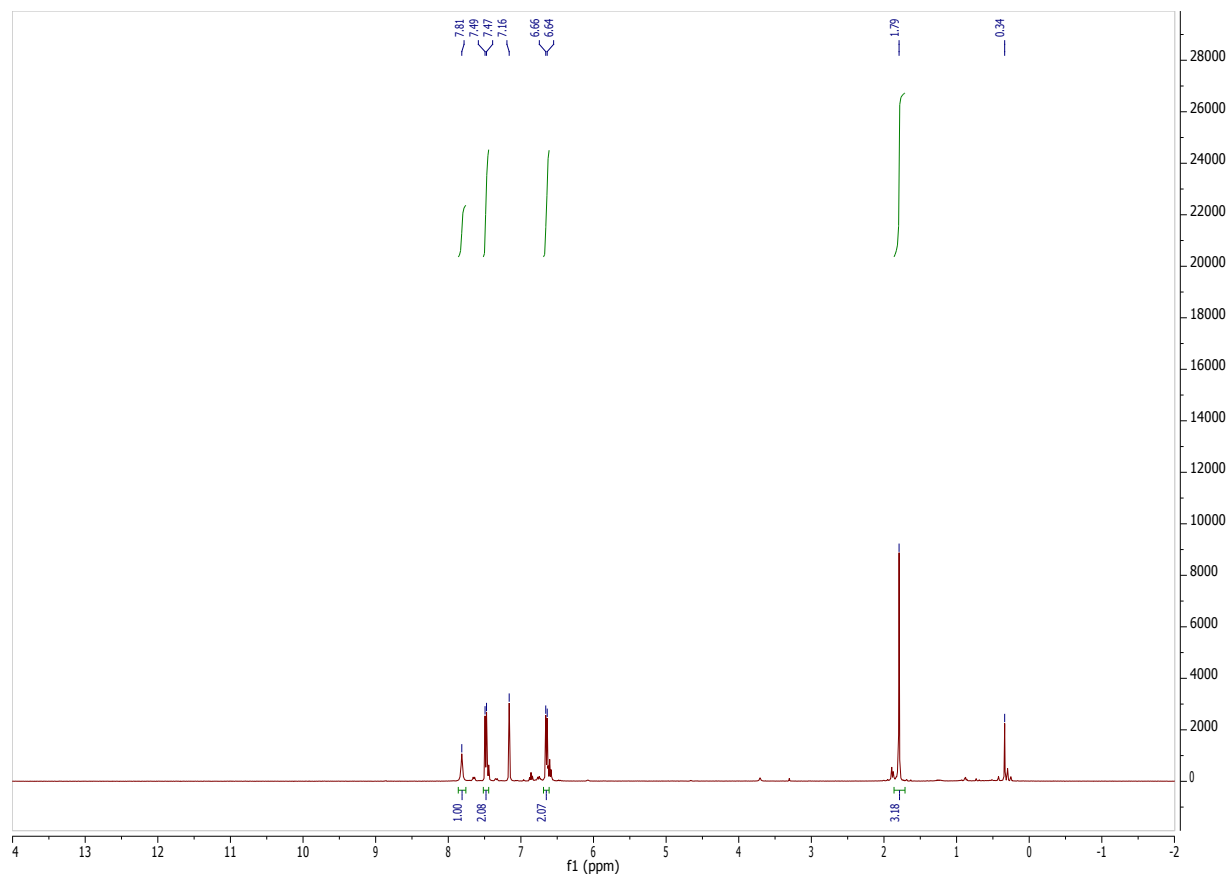

$^{11}B$

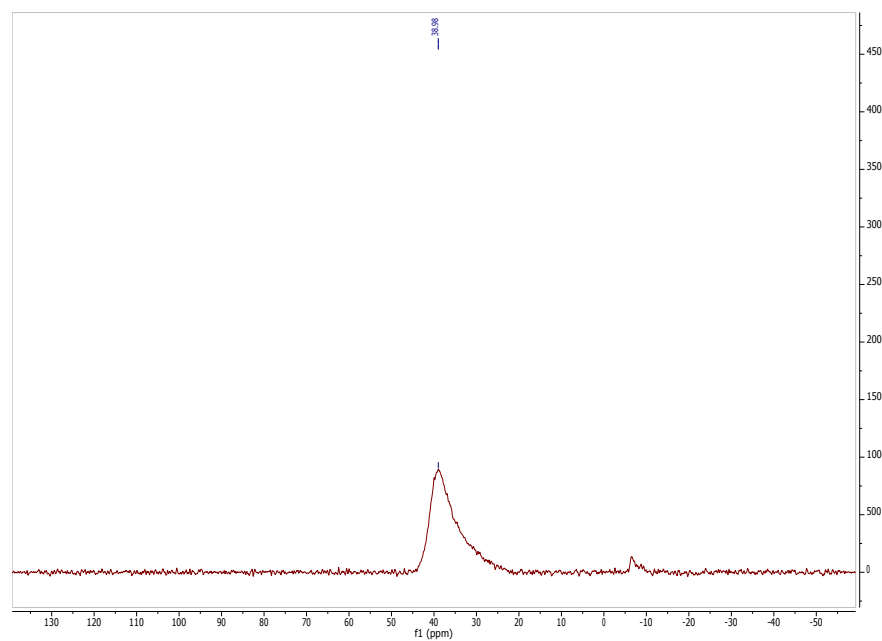



19F

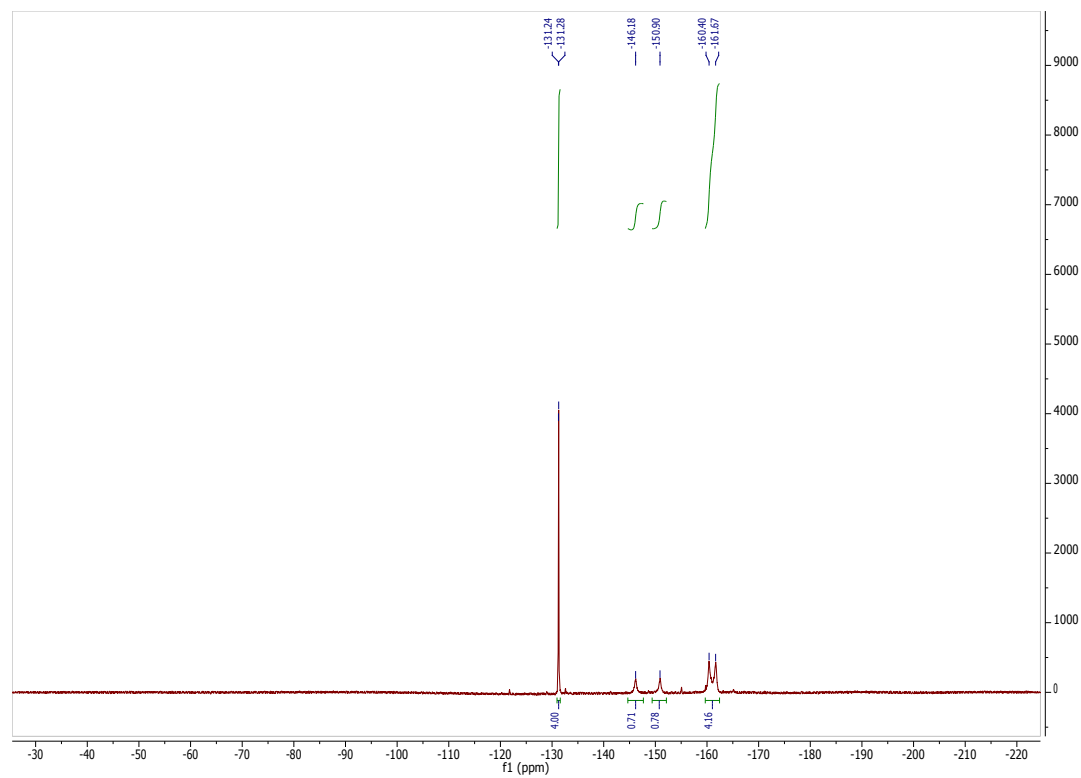

$(\text{C}_6\text{F}_5)_2\text{BNH}(\text{Cl})_s$   $^1\text{H}$

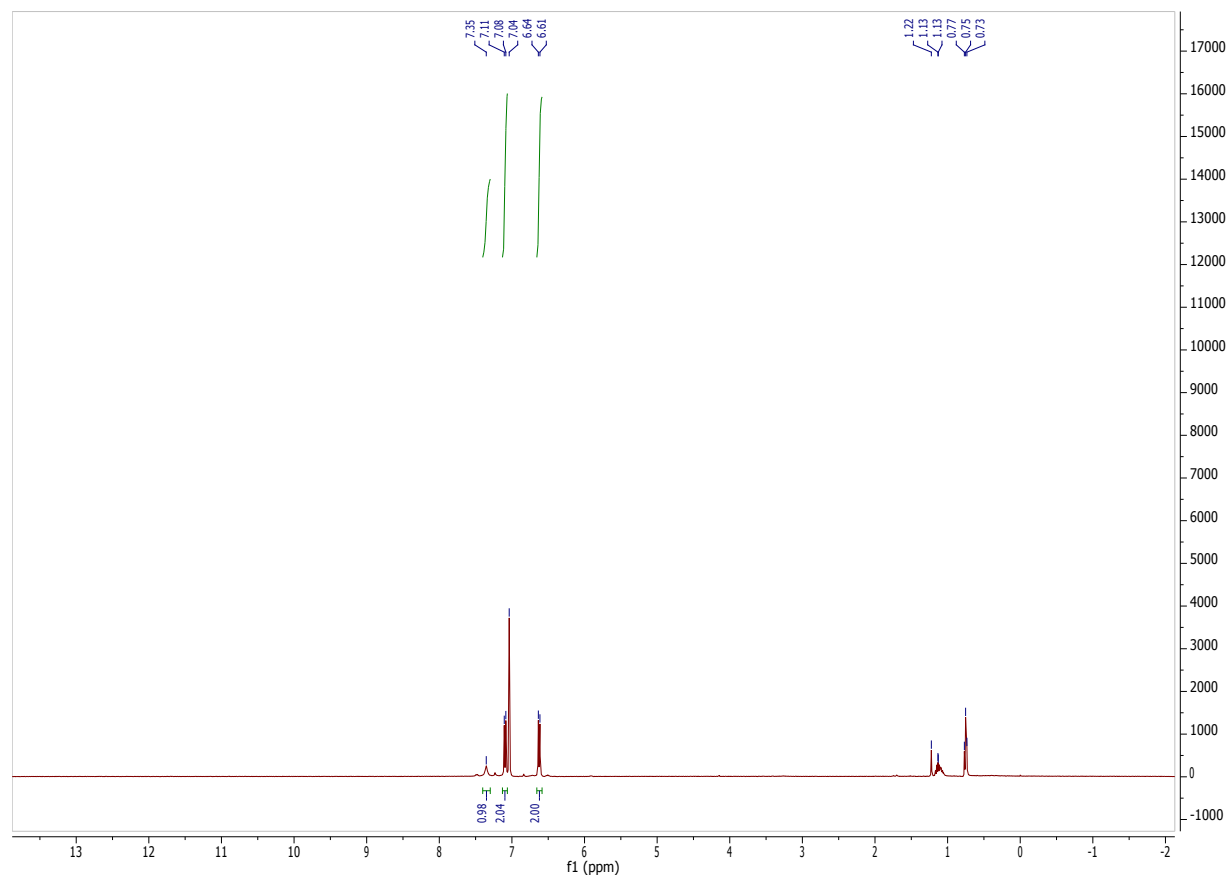

**<sup>11</sup>B**

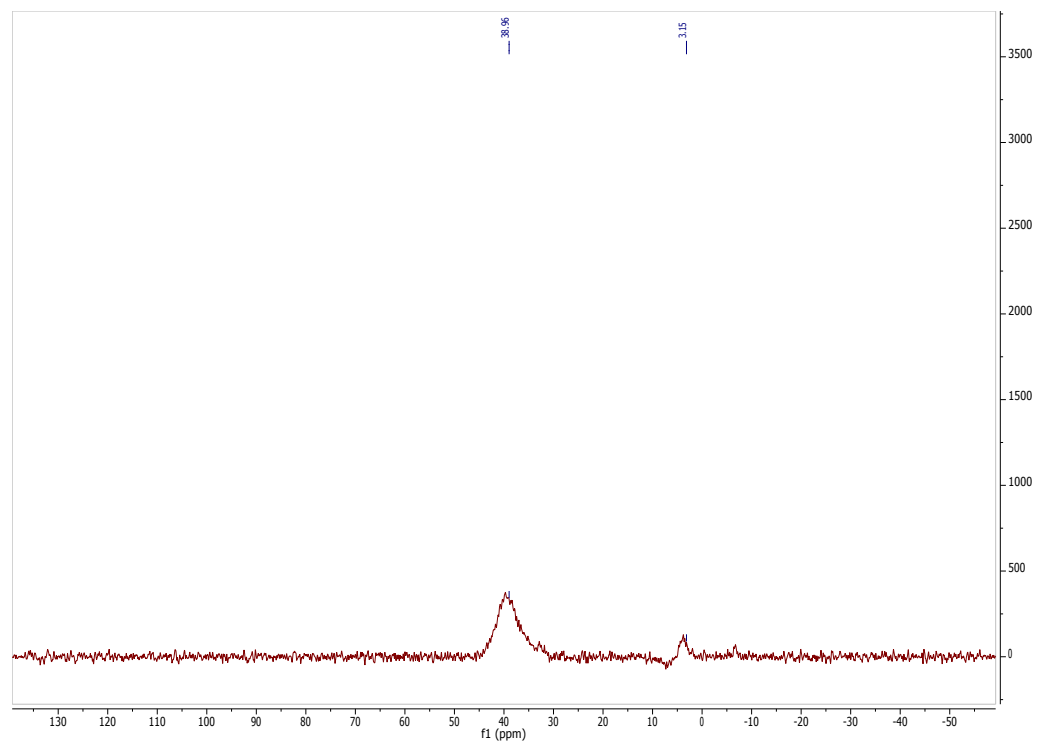

**<sup>19</sup>F**

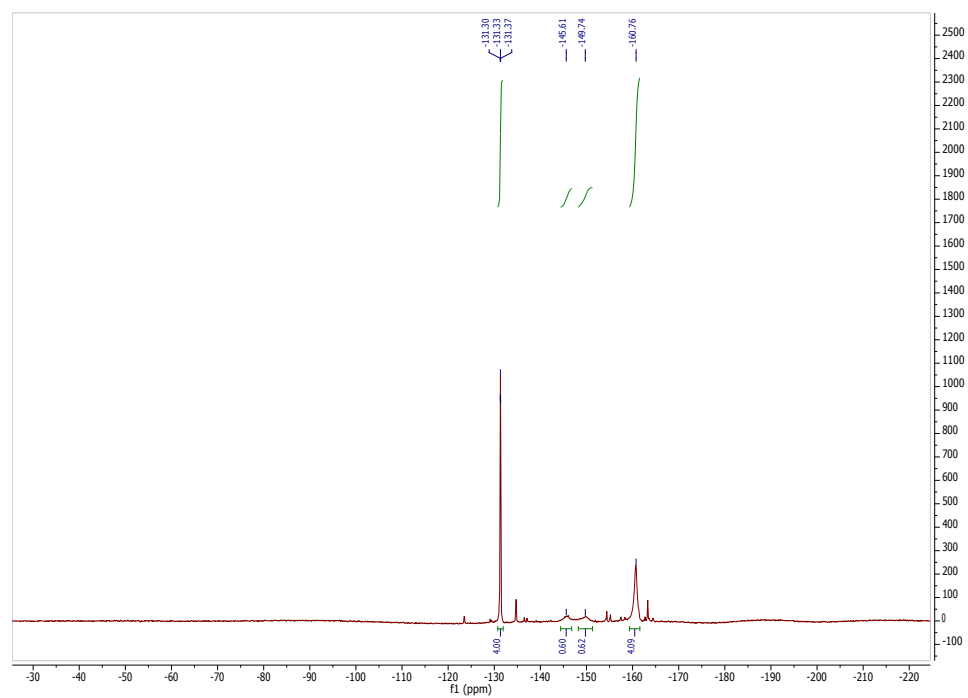

(C<sub>6</sub>F<sub>5</sub>)<sub>2</sub>BNH(Ms) **6** <sup>1</sup>H

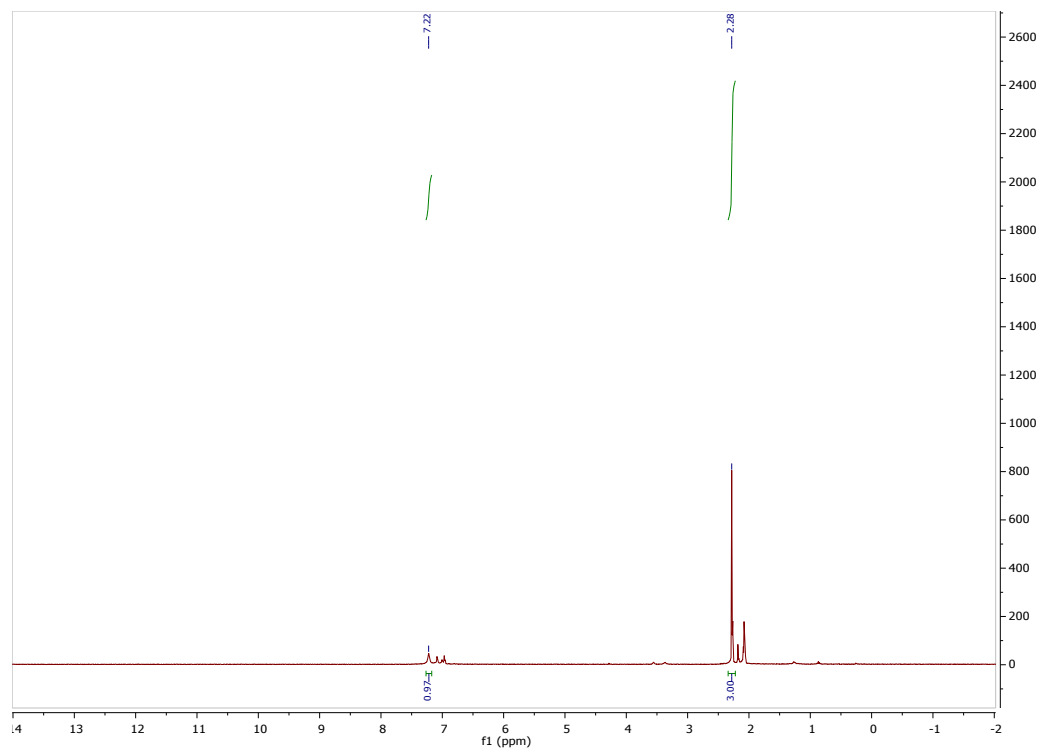

<sup>11</sup>B

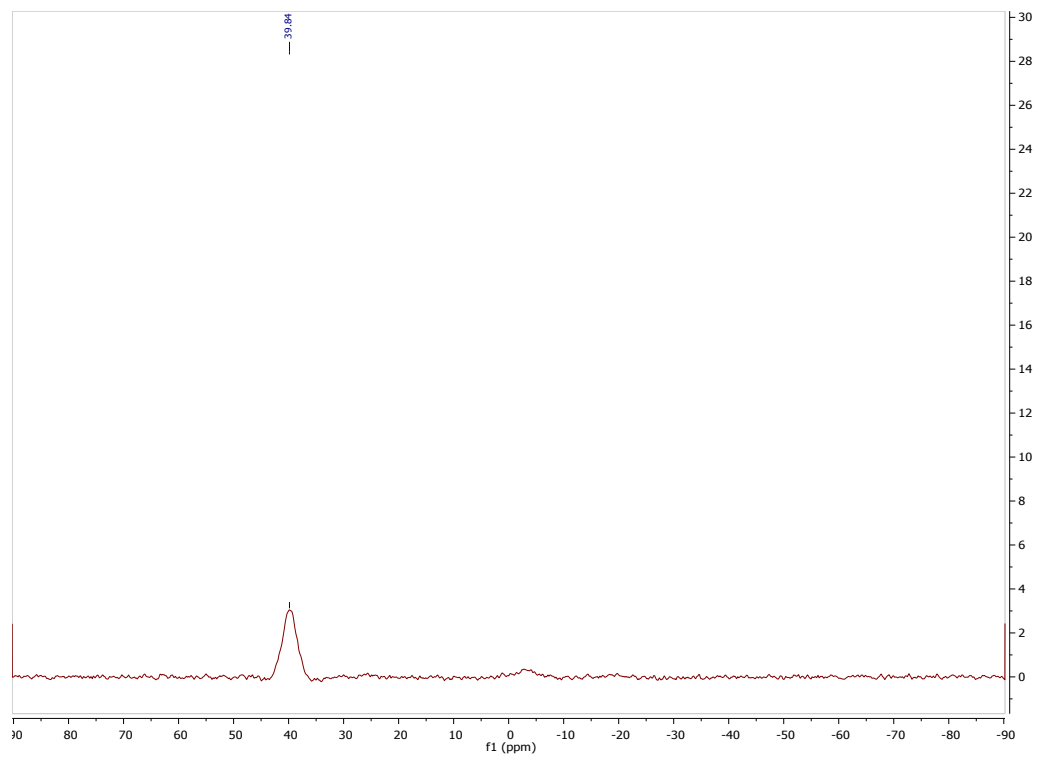

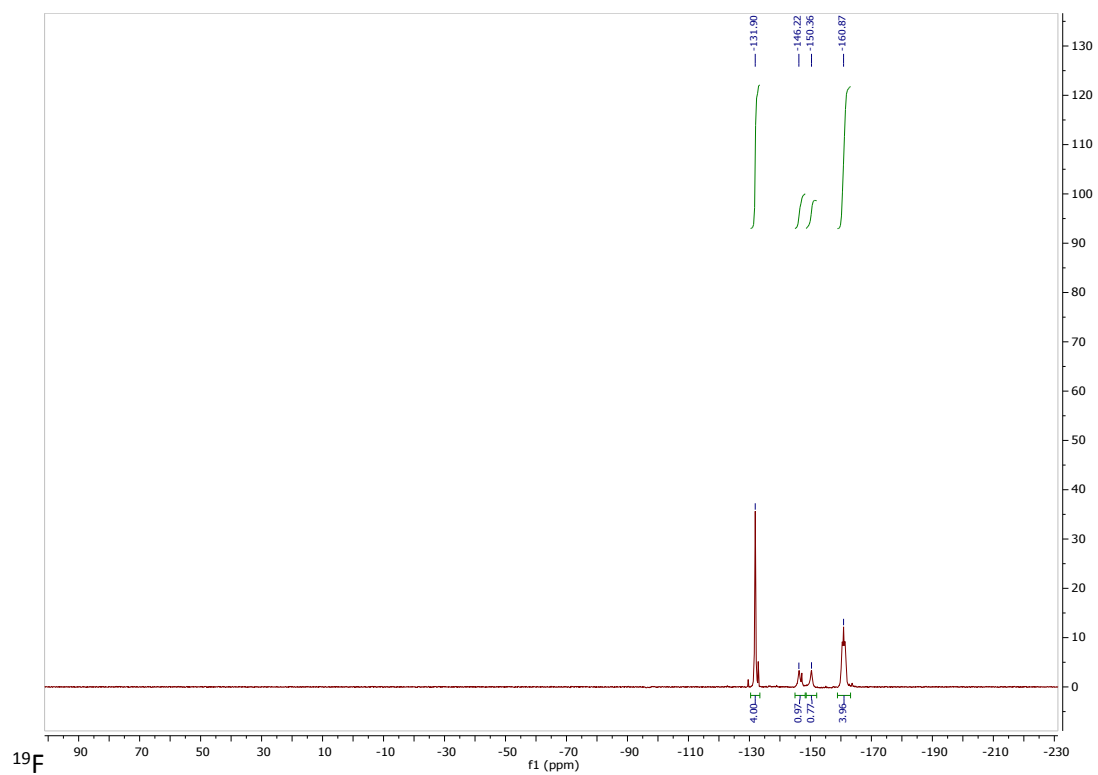

$(\text{C}_6\text{F}_5)_2\text{BNH}(\text{Ns})$  **7**  $^1\text{H}$

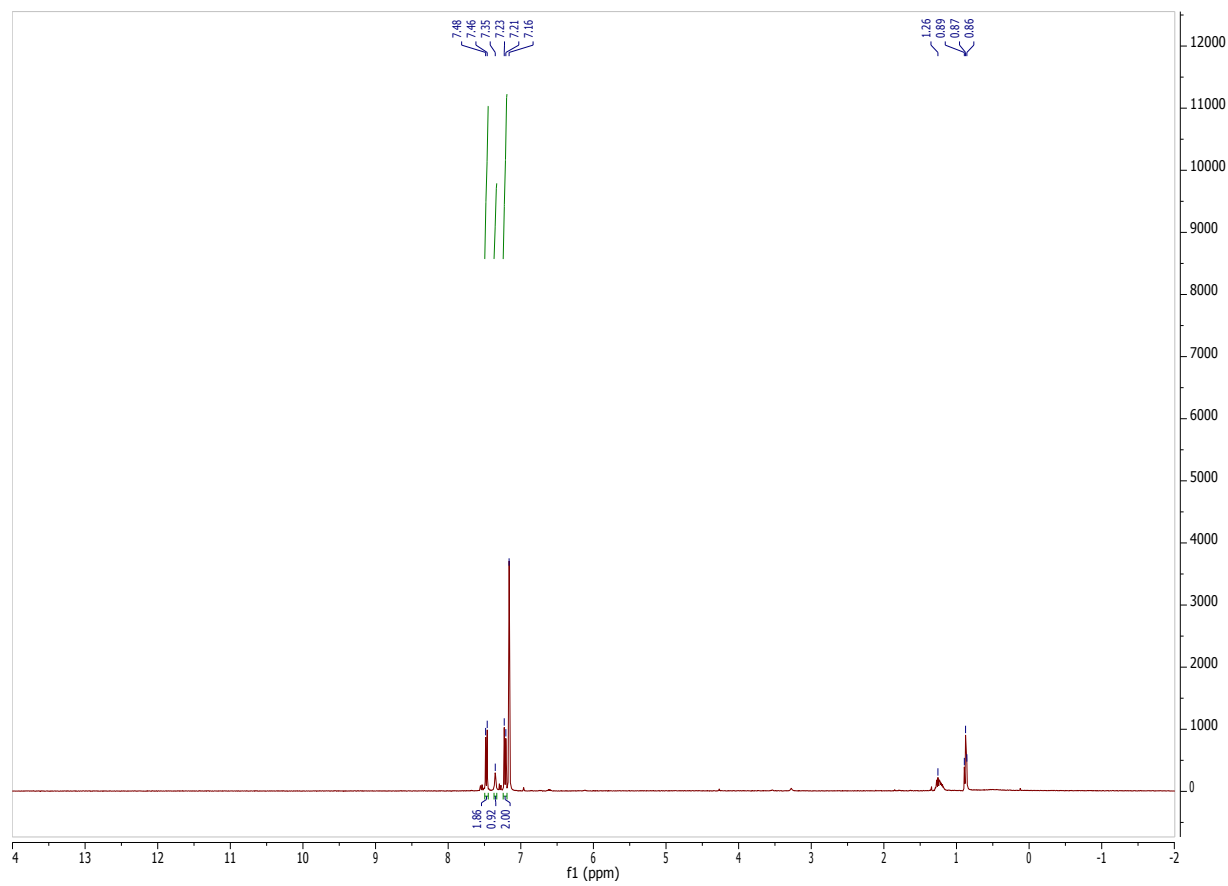

**<sup>11</sup>B**

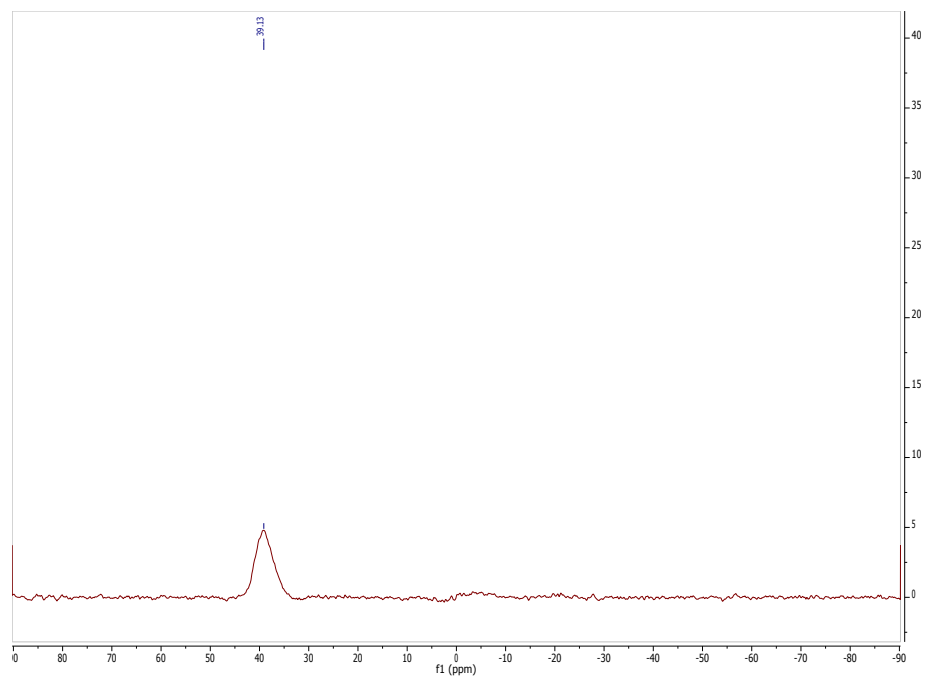

**<sup>1</sup>H**

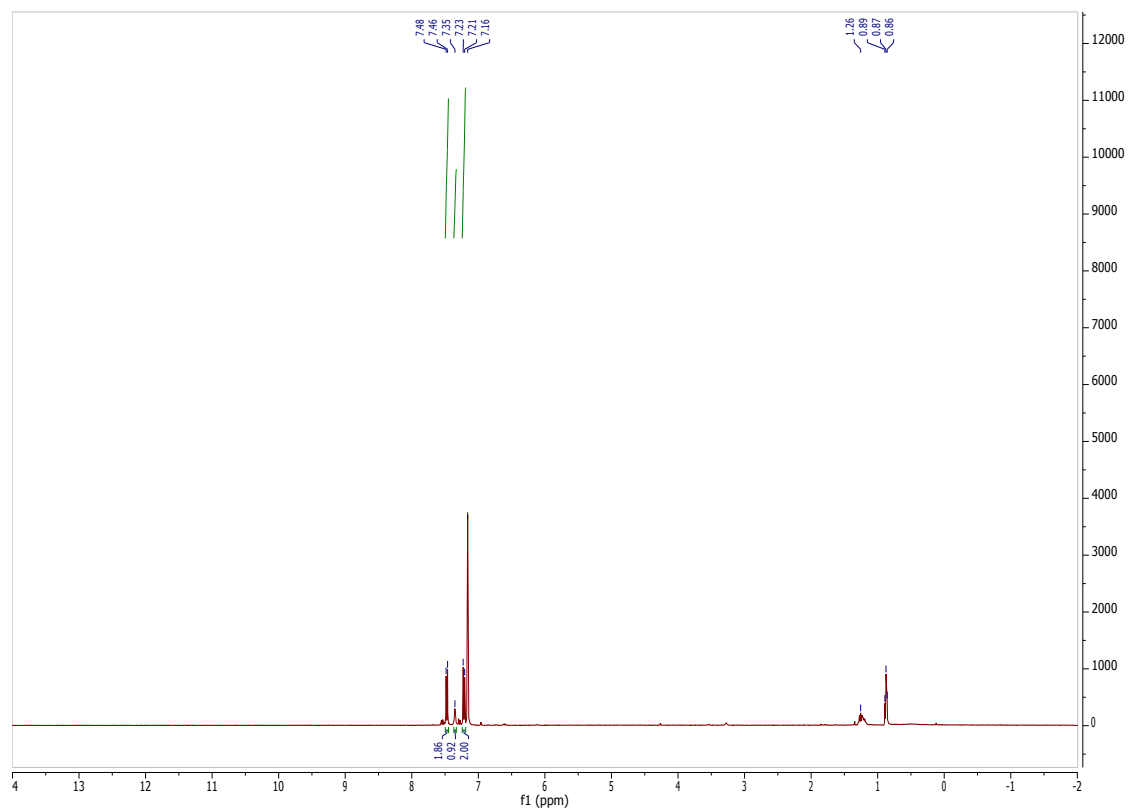

Supplement: c5dt00142k1.pdf [file c5dt00142k1.pdf]
